# Supplementary material
Source: PubMed Central journal article supplement (PMC11072527)
Supplement: 18_2021_4081_MOESM2_ESM.pdf [file 18_2021_4081_MOESM2_ESM.pdf]

**Supplementary Table 1. Comparison of disease phenotype between full body and intestinal epithelial-specific K8 knockout mouse models.**

|                                                                         | Keratin 8 knockout mouse models       |                                                          |                                                                |                                      | References                                                                                                                |
|-------------------------------------------------------------------------|---------------------------------------|----------------------------------------------------------|----------------------------------------------------------------|--------------------------------------|---------------------------------------------------------------------------------------------------------------------------|
|                                                                         | Full K8 knockouts (FVB/n background)* |                                                          | Intestinal epithelial cell K8 knockouts (C57BL/6 background)** |                                      |                                                                                                                           |
|                                                                         | K8 <sup>-/-</sup>                     | K8 <sup>flox/flox</sup> ; Villin-CreER <sup>12,***</sup> | K8 <sup>flox/flox</sup> ; Villin-Cre                           | K8 <sup>flox/flox</sup> ; Villin-Cre |                                                                                                                           |
| <b>Disease phenotype</b>                                                |                                       |                                                          |                                                                |                                      |                                                                                                                           |
| <b>Colon inflammation</b>                                               | Yes, early onset                      | n.d.                                                     | Yes, in aging mice                                             |                                      | Habtezion et al., 2005; Toivola et al., 2004; Asghar et al., 2014                                                         |
| <b>Colonic epithelial hyperproliferation and increased crypt length</b> | Yes                                   | Yes                                                      | Yes                                                            |                                      | Baribault et al. 1994; Toivola et al., 2004                                                                               |
| <b>Cryptless/damaged areas</b>                                          | Yes                                   | Yes                                                      | Yes                                                            |                                      | Asghar et al., 2015                                                                                                       |
| <b>Intestinal barrier compromised</b>                                   | Yes                                   | n.d.                                                     | Yes                                                            |                                      | Misiorek et al., 2016                                                                                                     |
| <b>Diarrhea</b>                                                         | Yes                                   | Yes                                                      | Yes                                                            |                                      | Toivola et al., 2004                                                                                                      |
| <b>Enhanced colorectal cancer susceptibility</b>                        | Yes                                   | n.d.                                                     | Yes                                                            |                                      | Misiorek et al., 2016                                                                                                     |
| <b>Rectal prolapse</b>                                                  | Observed                              | none                                                     | Observed                                                       |                                      | Baribault et al. 1994                                                                                                     |
| <b>Defects in other epithelial organs</b>                               | Yes                                   | n.d.                                                     | none                                                           |                                      | Tao et al., 2003; Jaquemar et al., 2003; Mathew et al., 2013; Alam et al., 2013; Odaka et al. 2013; Silvester et al. 2017 |
| <b>Embryo lethality</b>                                                 | 50 %                                  | none                                                     | none                                                           |                                      | Baribault et al. 1994                                                                                                     |
| <b>Female infertility</b>                                               | Yes                                   | none                                                     | none                                                           |                                      | Baribault et al. 1994                                                                                                     |

\*C57Bl/6, K8<sup>-/-</sup> mice are 95% embryo lethal with 100% female infertility (Baribault et al. 1993); \*\*results from this study; \*\*\*25 days after tamoxifen treatment; n.d. not determined

| Supplementary Table 2. Summary of K8 dependent cellular and serum molecular phenotypes in the colonic epithelium and serum of full body and the intestinal epithelium specific K8 knockout mouse |              |                                         |                                                                    |                                                          |
|--------------------------------------------------------------------------------------------------------------------------------------------------------------------------------------------------|--------------|-----------------------------------------|--------------------------------------------------------------------|----------------------------------------------------------|
| Molecular phenotype                                                                                                                                                                              |              | Keratin 8 knockout mouse models         |                                                                    | References                                               |
|                                                                                                                                                                                                  |              | Full K8 knockouts<br>(FVB/n background) | Intestinal epithelial cell<br>K8 knockouts<br>(C57BL/6 background) |                                                          |
|                                                                                                                                                                                                  |              | K8 <sup>-/-</sup>                       | K8 <sup>flox/flox</sup> ; Villin-Cre                               |                                                          |
| Simple epithelial keratins                                                                                                                                                                       | K7           | ↓                                       | ↓*                                                                 | Asghar et al., 2015; Figure 1                            |
|                                                                                                                                                                                                  | K18          | ↓                                       | ↓*                                                                 |                                                          |
|                                                                                                                                                                                                  | K19          | ↓                                       | ↓*                                                                 |                                                          |
|                                                                                                                                                                                                  | K20          | ↓                                       | ↓*                                                                 |                                                          |
| Cell proliferation and tissue repair                                                                                                                                                             | IL-22        | ↑                                       | ↑                                                                  | Misiorek et al., 2016; Figure 5; Supplemental Figure 6   |
|                                                                                                                                                                                                  | IL-22BP      | ↓                                       | ↓*                                                                 |                                                          |
|                                                                                                                                                                                                  | p-STAT3      | ↑                                       | ↑*                                                                 |                                                          |
|                                                                                                                                                                                                  | p-pRb        | ↑                                       | ↑                                                                  | Unpublished; Figure 5                                    |
| Cell differentiation/fate                                                                                                                                                                        | Goblet cells | ↑                                       | ↑                                                                  | Lähdeniemi et al., 2017; Figure 5; Supplemental Figure 6 |
|                                                                                                                                                                                                  | Villin       | ↓                                       | ↓                                                                  |                                                          |
|                                                                                                                                                                                                  | Notch1       | ↓                                       | ↓*                                                                 |                                                          |
| Energy metabolism                                                                                                                                                                                | HMGSC2       | ↓                                       | ↓                                                                  | Helenius et al., 2015; Unpublished                       |
| Serum cytokines                                                                                                                                                                                  | IL-1β        | ↑                                       | ↑                                                                  | Supplemental Figure 5                                    |
|                                                                                                                                                                                                  | IL-5         | ↑                                       | n.s                                                                |                                                          |
|                                                                                                                                                                                                  | IL-6         | ↑                                       | n.s                                                                |                                                          |
|                                                                                                                                                                                                  | IL-18        | ↓                                       | ↓**                                                                |                                                          |
|                                                                                                                                                                                                  | IL-22        | ↑                                       | n.s                                                                |                                                          |
|                                                                                                                                                                                                  | IFNγ         | n.s                                     | n.s                                                                |                                                          |
|                                                                                                                                                                                                  | CCL-2        | n.s                                     | n.s                                                                |                                                          |
|                                                                                                                                                                                                  | TNFα         | n.s                                     | n.s                                                                |                                                          |

↑ indicates statistically significant increase and ↓ statistically significant decrease compared to respective K8 wild-type control mice; n.s. means non significant change, \*K8<sup>flox/flox</sup>; Villin-CreER<sup>12</sup> show similar results, \*\* in aging mice.

Supplementary Table 3. List of primary and secondary antibodies used for western-blot analyses and immunofluorescence

| Antibody name                          | Dilution       | Company                                                  |
|----------------------------------------|----------------|----------------------------------------------------------|
| Rabbit anti-K7                         | 1:1000/1:100*  | Abcam, Cambridge, UK (181598)                            |
| Rat anti-K8                            | 1:1000/1:1000* | Developmental Studies Hybridoma Bank, IA, USA (troma I)  |
| Rabbit anti-K18                        | 1:1000/1:1000* | Kind gift from John Eriksson lab                         |
| Rat anti-K19                           | 1:1000/1:1000* | EMD Millipore Corporation, CA, USA (MABT913)             |
| Rabbit anti-K20                        | 1:1000         | Abcam, Cambridge, UK (97511)                             |
| Rabbit anti-Mu2                        | 1:1000         | Abcam, Cambridge, UK (272692)                            |
| Rabbit anti-Villin                     | 1:1000         | Invitrogen, Thermo Fisher Scientific, CA, USA (PA517290) |
| Rabbit anti-pRb                        | 1:1000         | Abcam, Cambridge, UK (181616)                            |
| Rabbit anti-phospho-pRb (ser807/811)   | 1:1000         | Cell Signaling, MA, USA (8516)                           |
| Rabbit anti-full length Notch 1        | 1:1000         | Cell Signaling, MA, USA (D1E11)                          |
| rabbit anti-cleaved Notch 1 (Val1744)  | 1:1000         | Cell Signaling, MA, USA (D3B8)                           |
| Rabbit anti-full length Notch 1 (C-20) | 1:1000         | Santa Cruz, TX, USA (sc-6014)                            |
| Mouse anti-STAT3                       | 1:1000         | Cell Signaling, MA, USA (9139)                           |
| Rabbit anti-phospho-STAT3 (tyr705)     | 1:1000         | Cell Signaling, MA, USA (9145)                           |
| Sheep anti-IL-22BP                     | 1:1000         | R&D systems (AF2376)                                     |
| Rat anti-Hsc70                         | 1:1000         | Stressgen Bioreagents, MI, USA (SPA-815B)                |

\* dilution factor applied for immunostainings

Supplementary Table 4. List of secondary antibodies used for western-blot analyses and immunofluorescence

| Antibody name                           | Dilution       | Company                                    |
|-----------------------------------------|----------------|--------------------------------------------|
| Anti-rabbit Alexa Fluor 488/680**/800** | 1:10000/1:200* | Invitrogen, CA, USA (A21206/A32734/A32735) |
| Anti-rat Alexa Fluor 488/568/680**      | 1:10000/1:200* | Invitrogen, CA, USA (A21208/A11077/A21096) |
| Anti-rabbit IgG-HRP                     | 1:10000        | Promega, WI, USA (W401B)                   |
| Anti-rat IgG-HRP                        | 1:10000        | Cell signaling, MA, USA (7077S)            |
| Anti-mouse IgG-HRP                      | 1:10000        | GE Healthcare, UK (NA931V)                 |
| Anti-sheep IgG-HRP                      | 1:10000        | Sigma-Aldrich, MO, USA (12-342)            |

\* dilution factor applied for immunostainings

\*\* secondary only used for western-blot analyses

**Supplemental Table 5. Primer sequences used for TaqMan and SYBR Green used for qRT-PCR gene expression analysis**

| Gene            | Primer sequence                         |                                     |
|-----------------|-----------------------------------------|-------------------------------------|
|                 | Forward primer                          | Reverse primer                      |
| <b>18S rRNA</b> | 5'-GCA ATT ATT CCC CAT GAA CG -3'       | 5'-GGG ACT TAA TCA ACG CAA GC -3'   |
| <i>Actb</i>     | 5'-TGG CTC CTA GCA CCA TGA AGA-3'       | 5'-GTG GAC AGT GAG GCC AGG AT-3'    |
| <i>Krt7</i>     | 5'-GGA GAT GGC CAA CCA CAG-3'           | 5'-GGC CTG GAG TGT CTC AAA CTT-3'   |
| <i>Krt8</i>     | 5'-TGA ATT TGT CCT CAT CAA GAA GG-3'    | 5'-GGA TCT CCT CTT CAT GGA TCT G-3' |
| <i>Krt18</i>    | 5'-AGA TGA CAC CAA CAT CAT CAC AAG G-3' | 5'-CTT CCA GAC CTT GGA CTT CCT-3'   |
| <i>Krt19</i>    | 5'-TGA CCT GGA GAT GCA GAT TG-3'        | 5'-CCT CAG GGC AGT AAT TTC CTC-3'   |
| <i>Krt20</i>    | 5'-AGC TGA GAC GCA CCT ACC AG-3'        | 5'-TGC GCT CCA GAG ACT CTT TC-3'    |
| <i>Krt23</i>    | 5'-TCA TGA AGA AAC GCC ATG AG-3'        | 5'-CCT TGA AGT CAC TCG GCA AG-3'    |
| <i>S100a11</i>  | 5'-GGG AAG GAT GGA AAC AAC ACT-3'       | 5'-CAC CAG GAT CCT TCT GGT TC-3'    |
| <i>Plk1</i>     | 5'-GCA GCA GGA AAC CTC TCA A-3'         | 5'-GCT GTA GCA AGT CAC TAA GGT-3'   |
| <i>Mybl2</i>    | 5'-GCT GAT GTC CTC TAC CAT GC-3'        | 5'-CTG TTA CCC TCT TTG CTA CCT G-3' |
| <i>Cdk1</i>     | 5'-GAC TAC AAG AAC ACC TTT CCC A-3'     | 5'-CGT TTG GCA GGA TCA TAG ACT-3'   |
| <i>Ccnb1</i>    | 5'-GCC TAT ATT GCA TTT CCT AGT GTG-3'   | 5'GAA TGA AGC CAA GCA AGA CAT-3'    |

**Supplemental Table 6. TaqMan Gene Expression Assays used for qRT-PCR gene expression analysis**

| <b>Gene</b> | <b>Expression Assay#</b> |
|-------------|--------------------------|
| <i>Bact</i> | Mm02619580_g1            |
| <i>Ccl2</i> | Mm00441242_m1            |
| <i>Mpo</i>  | Mm01298424_m1            |
| <i>Il18</i> | Mm00434226_m1            |
| <i>Il22</i> | Mm01226722_g1            |
| <i>Il4</i>  | Mm00445259_m1            |
| <i>Il6</i>  | Mm00446190_m1            |
| <i>Il1b</i> | Mm00434228_m1            |
